# Supplementary material
Source: MDPI journal article supplement (https://www.mdpi.com/2673-6209/4/2/18)
Supplement: s1 [file s1]

## Supplementary Materials

# Simultaneous Removal of Seven Pharmaceutical Compounds from a Water Mixture using Modified Chitosan Adsorbent Materials

Myrsini Papageorgiou <sup>1</sup>, Konstantinos N. Maroulas <sup>2</sup>, Eleni Evgenidou <sup>1,3</sup>, Dimitrios N. Bikiaris <sup>4</sup>, George Z. Kyzas <sup>2</sup> and Dimitra A. Lambropoulou <sup>1,3,\*</sup>

<sup>1</sup> Laboratory of Environmental Pollution Control, Department of Chemistry, Aristotle University of Thessaloniki, GR-541 24 Thessaloniki, Greece; myrsinipapag@gmail.com (M.P.); evgenido@chem.auth.gr (E.E.)

<sup>2</sup> Hephaestus Laboratory, Department of Chemistry, School of Science, Democritus University of Thrace, GR-654 04 Kavala, Greece; kostasmar.97@gmail.com (K.N.M.); kyzas@chem.duth.gr (G.Z.K.)

<sup>3</sup> Center for Interdisciplinary Research and Innovation (CIRI-AUTH), Balkan Center, 10th km Thessaloniki-Thermi Rd, GR-570 01 Thessaloniki, Greece

<sup>4</sup> Laboratory of Polymers, Department of Chemistry, Aristotle University of Thessaloniki, GR-541 24 Thessaloniki, Greece; dbic@chem.auth.gr

\* Correspondence: dlambro@chem.auth.gr; Tel.: +30-2310-997687; Fax: +30-2310-997859.

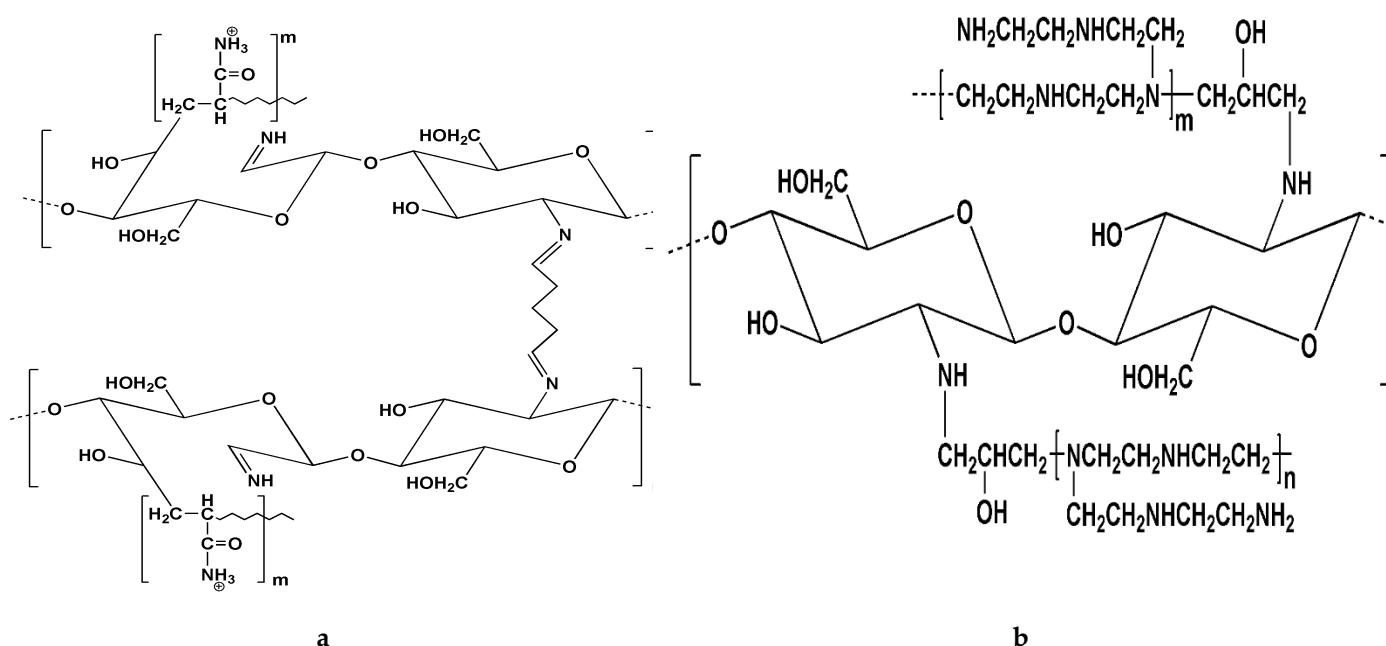

**Figure S1.** Chemical structure of a) CS-AMI and b) CS-PEI.
